# Supplementary material for: Indenofluorene- and carbazole-based copolymers for blue PLEDs with simultaneous high efficiency and good color purity
Source: Royal Society of Chemistry journal article supplement (doi:10.1039/d0tc03796f), 2020-01-01
Supplement: d0tc03796f1.pdf [file d0tc03796f1.pdf]

Supplementary Information

**Indenofluorene and carbazole based copolymers for blue PLEDs simultaneously with high efficiency and good color purity**

*Dengfeng Mei,<sup>a,b,c</sup> Liuqing Yang,<sup>a,b,c</sup> Lei Zhao,<sup>a,\*</sup> Shumeng Wang,<sup>a</sup> Hongkun Tian,<sup>a,b,\*</sup> Junqiao Ding,<sup>a,b,c,\*</sup> and Lixiang Wang<sup>a,b</sup>*

<sup>a</sup>State Key Laboratory of Polymer Physics and Chemistry, Changchun Institute of Applied Chemistry, Chinese Academy of Sciences, Changchun 130022, P. R. China

<sup>b</sup>University of Science and Technology of China, Hefei 230026, P. R. China

<sup>c</sup>School of Chemical Science and Technology, Yunnan University, Kunming 650091, P. R. China

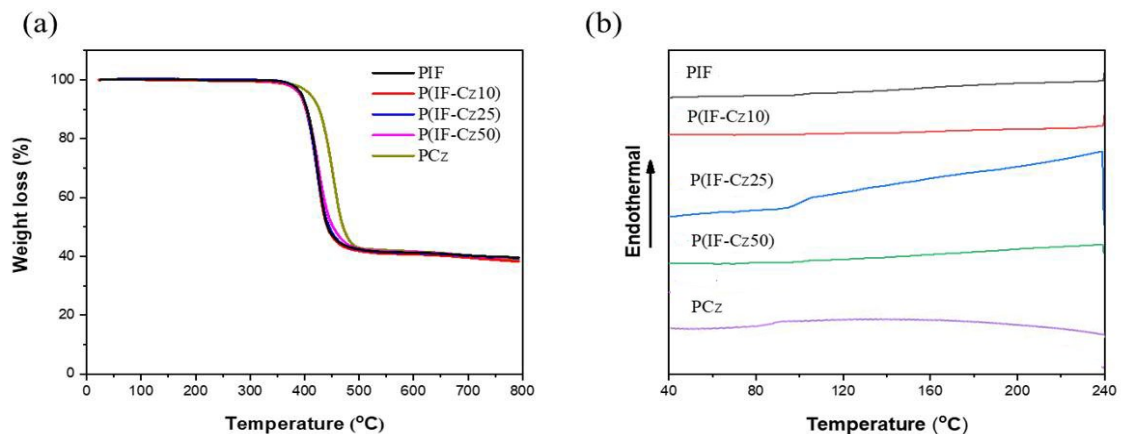

**Figure S1.** TGA (a) and DSC traces (b) for P(IF-Cz10), P(IF-Cz25) and P(IF-Cz50) compared with PIF and PCz.

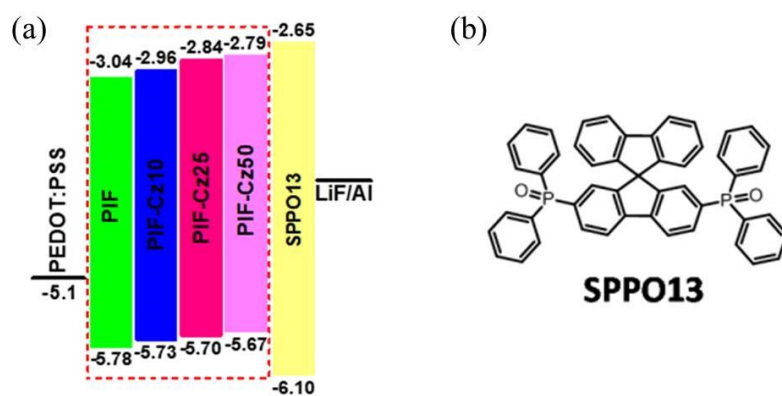

**Figure S2.** Energy level alignment of PLEDs (a) and molecular structure of used electron-transporting material (b).

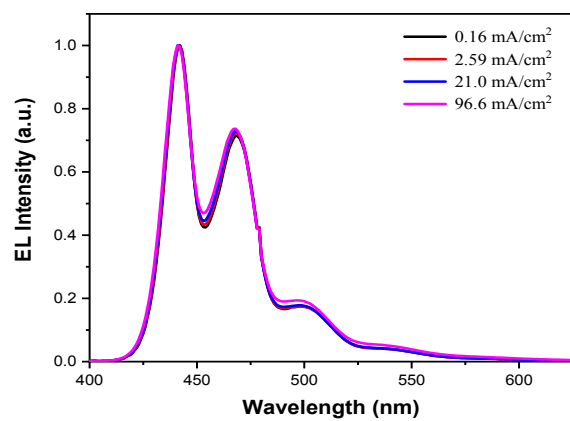

**Figure S3.** EL spectra of P(IF-Cz25) under various current density.

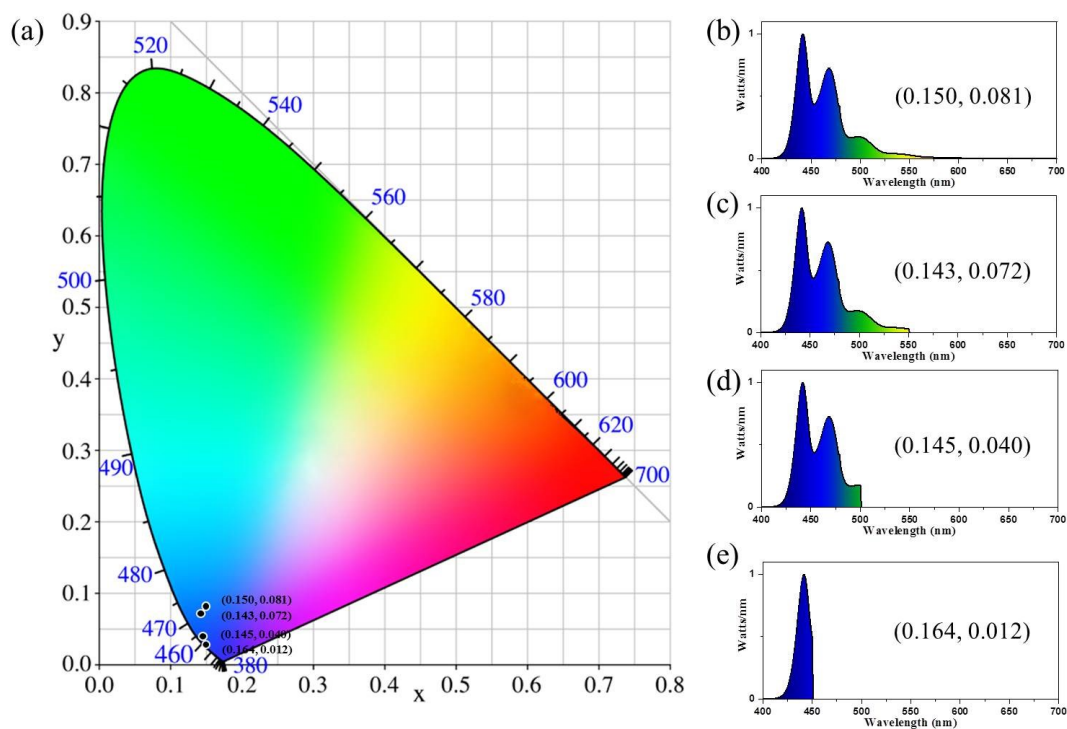

**Figure S4.** (a) CIE color coordinates of EL spectra of P(IF-Cz25) with and without optical filters; (b) full spectrum; (c) spectrum cut off above 550 nm; (d) spectrum cut off above 500 nm; and (e) spectrum cut off above 450 nm.

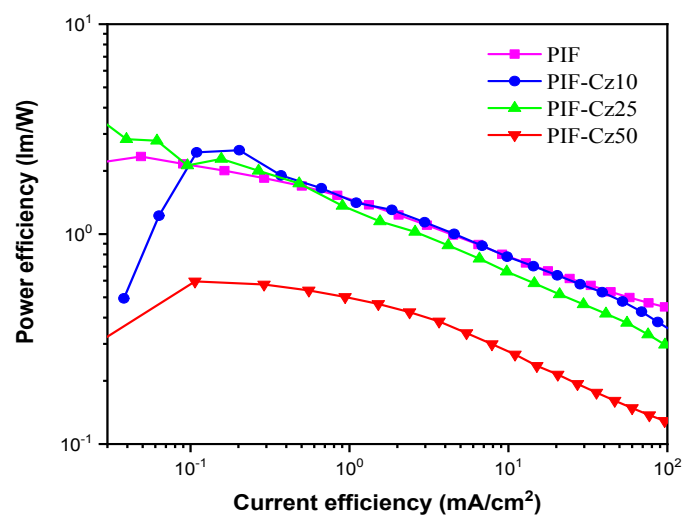

**Figure S5.** Power efficiency as a function of current density for P(IF-Cz10), P(IF-Cz25) and P(IF-Cz50) compared with PIF.

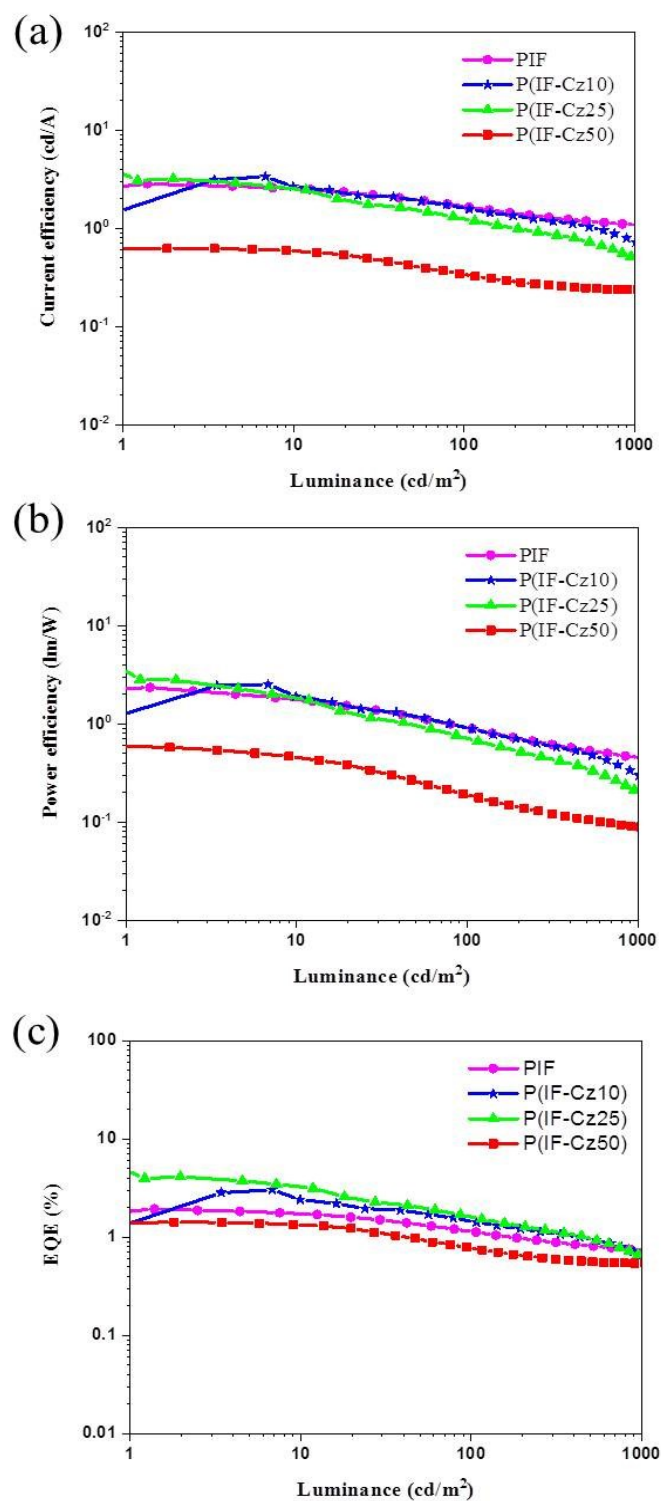

**Figure S6.** Luminance dependence of current efficiency, power efficiency and EQE for P(IF-Cz10), P(IF-Cz25) and P(IF-Cz50) compared with PIF.

**Table S1.** Device performance comparison between blue-emitting CPs with CIEy < 0.10.

| Polymer        | EQE (%) | CIE (x, y)     | Ref.                                                                        |
|----------------|---------|----------------|-----------------------------------------------------------------------------|
| PSiFF90        | 3.34    | (0.16, 0.07)   | <i>J. Mater. Chem.</i> , <b>2006</b> , <i>16</i> , 4133                     |
| P36-27SiF90    | 1.95    | (0.162, 0.084) | <i>J. Polym. Sci. Part A: Polym. Chem.</i> , <b>2007</b> , <i>45</i> , 4941 |
| PFO            | 1.94    | (0.16, 0.08)   | <i>Macromolecules</i> , <b>2007</b> , <i>40</i> , 804                       |
| PFCz-DPS1      | 1.46    | (0.159, 0.063) | <i>Adv. Funct. Mater.</i> , <b>2007</b> , <i>17</i> , 3808                  |
| PFCz-DPS1-OXD5 | 2.83    | (0.156, 0.08)  |                                                                             |
| PSiC8OF5       | 1.35    | (0.14, 0.05)   | <i>Macromolecules</i> , <b>2008</b> , <i>41</i> , 8354                      |
| G-sPF          | 2.23    | (0.16, 0.07)   | <i>Macromolecules</i> , <b>2012</b> , <i>45</i> , 1281                      |
| G-sPF-end-TAZ  | 7.28    | (0.16, 0.07)   |                                                                             |
| PFO-TFP        | 5.02    | (0.16, 0.05)   | <i>J. Mater. Chem. C</i> , <b>2013</b> , <i>1</i> , 5322                    |
| P2             | 3.9     | (0.16, 0.06)   | <i>J. Mater. Chem. C</i> , <b>2015</b> , <i>3</i> , 2479                    |
| PSF-Cz         | 4.10    | (0.16, 0.08)   | <i>J. Mater. Chem. C</i> , <b>2016</b> , <i>4</i> , 905                     |
| P(Cz-SF)       | 3.0     | (0.17, 0.06)   | <i>Polym. Chem.</i> , <b>2017</b> , <i>8</i> , 2182                         |
| PSSiBF         | 2.8     | (0.16, 0.06)   | <i>Org. Electron.</i> , <b>2018</b> , <i>59</i> , 77                        |
| PSDBASiF       | 2.74    | (0.16, 0.06)   | <i>J. Mater. Chem. C</i> , <b>2018</b> , <i>6</i> , 9599                    |
| P(IF-Cz25)     | 4.12    | (0.150, 0.081) | This work                                                                   |





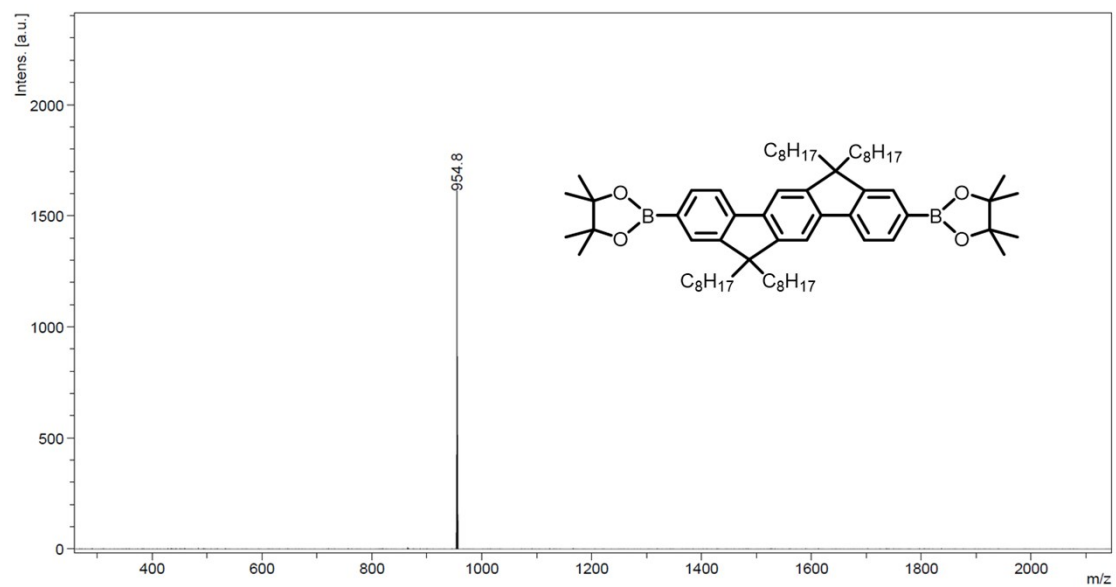

**Figure S8.** MALDI-TOF MS spectrum of the monomer **M2**.

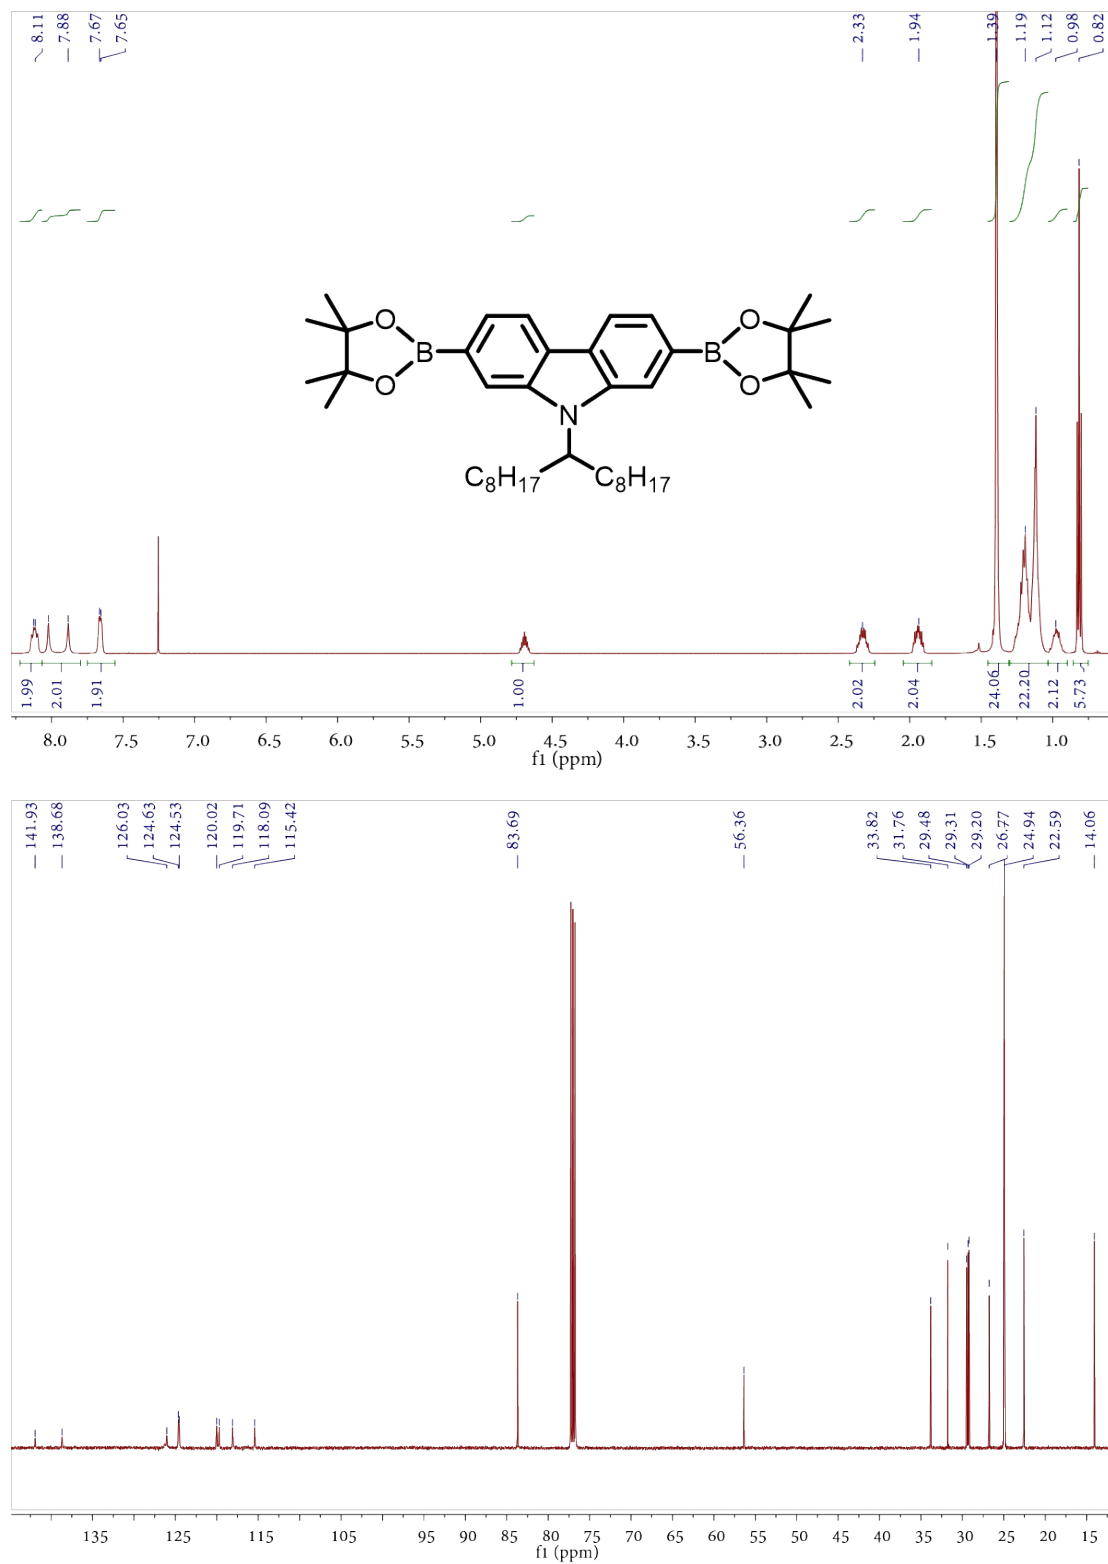

**Figure S9.**  $^1\text{H}$  and  $^{13}\text{C}$  NMR spectra of the monomer M4.

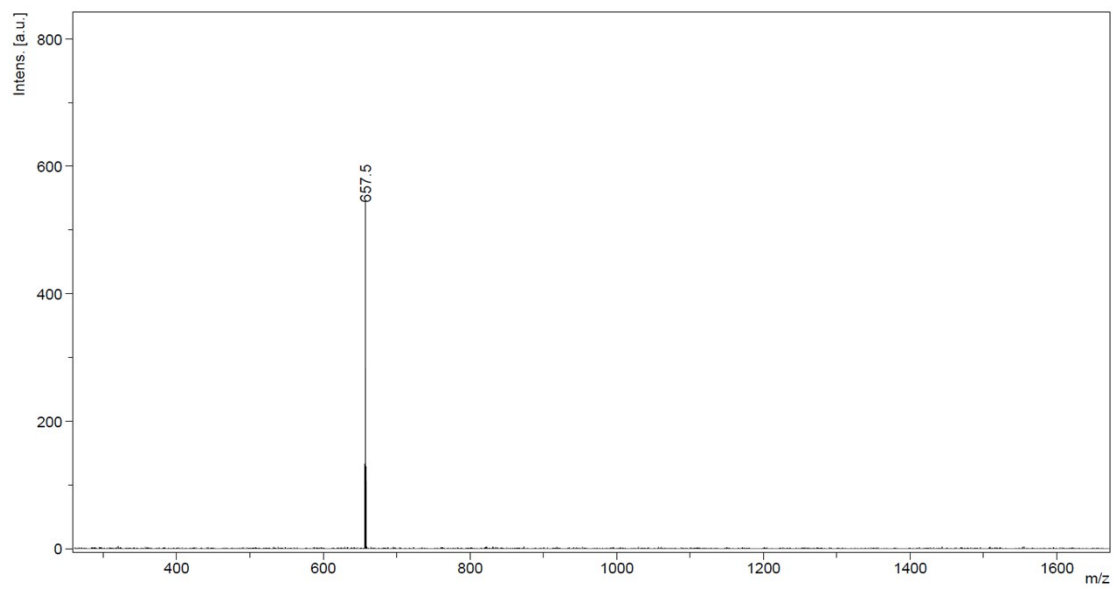

**Figure S10.** MALDI-TOF MS spectrum of the monomer **M4**.

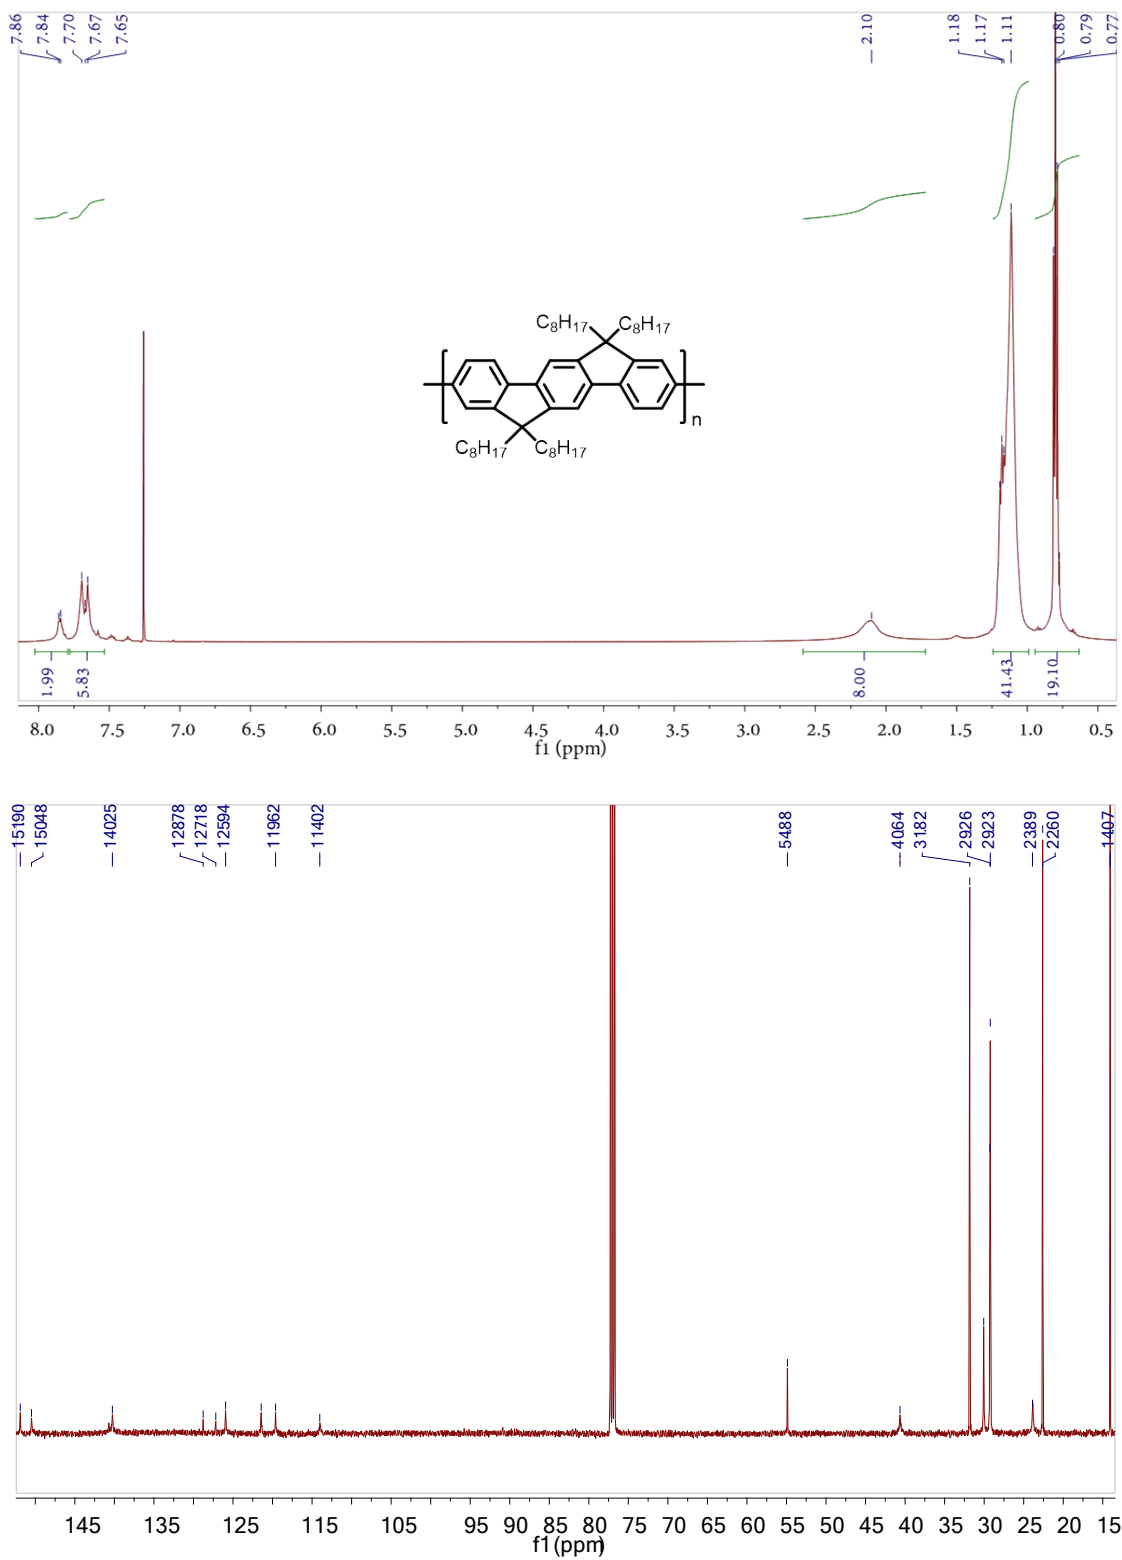

**Figure S11.**  $^1\text{H}$  and  $^{13}\text{C}$  NMR spectra of PIF.

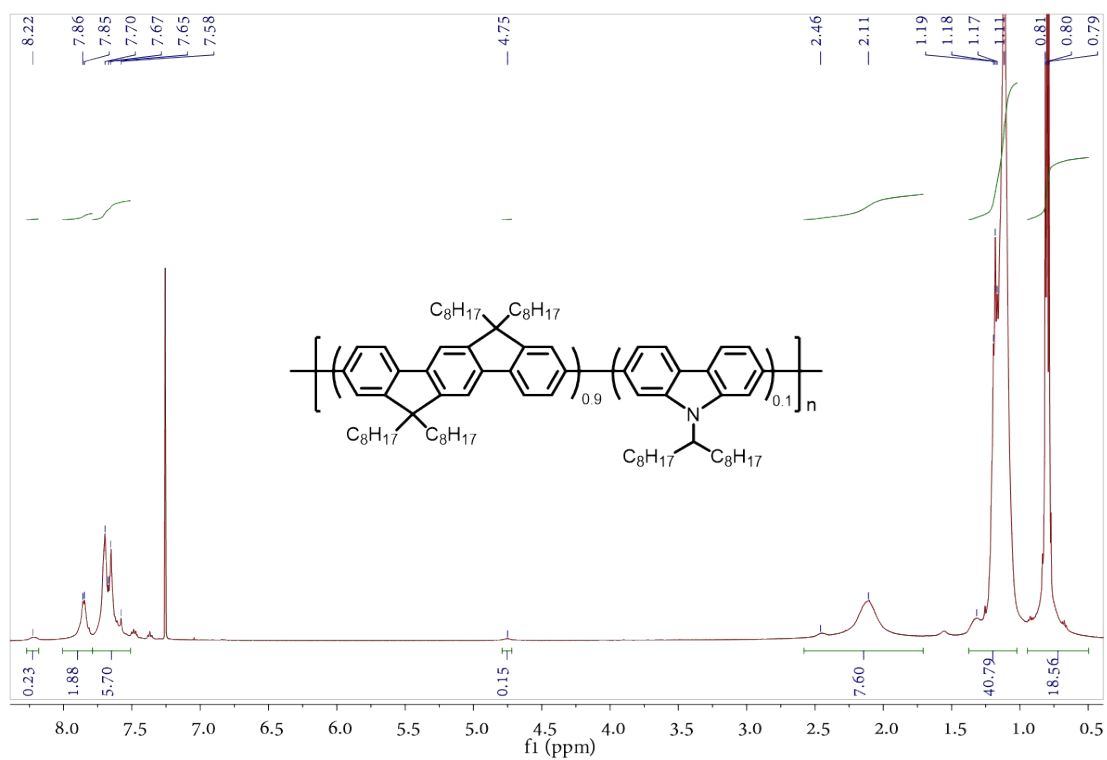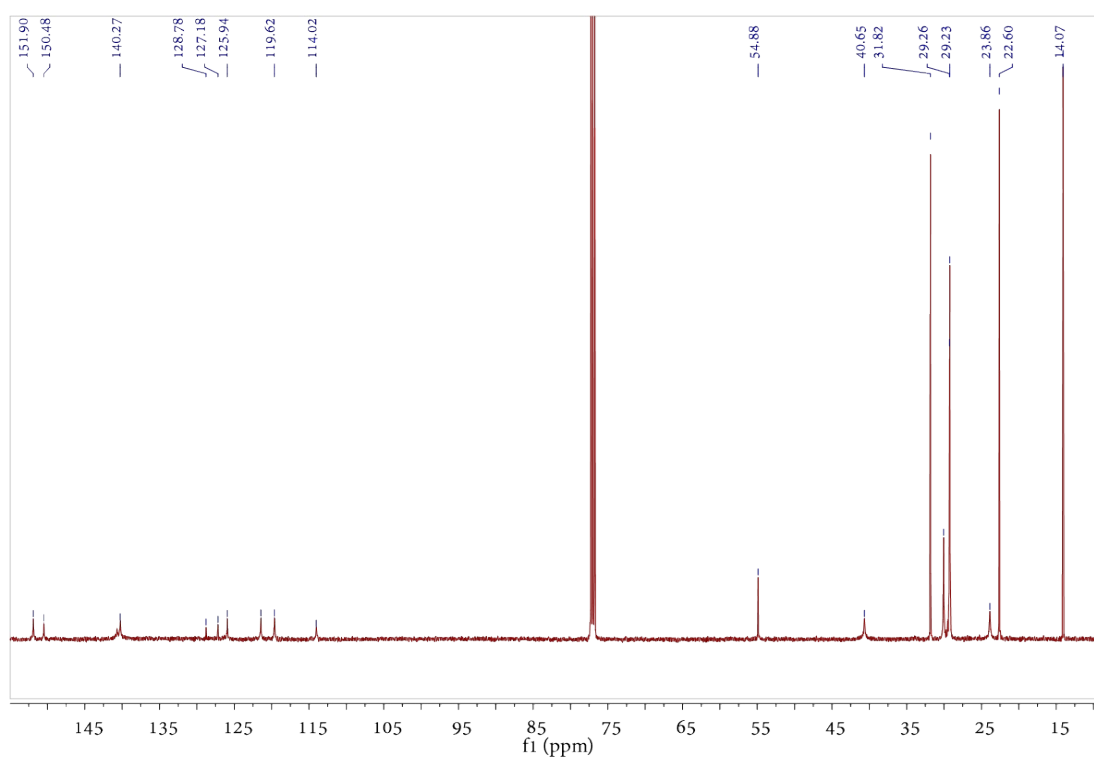

**Figure S12.** <sup>1</sup>H and <sup>13</sup>C NMR spectra of P(IF-Cz10).

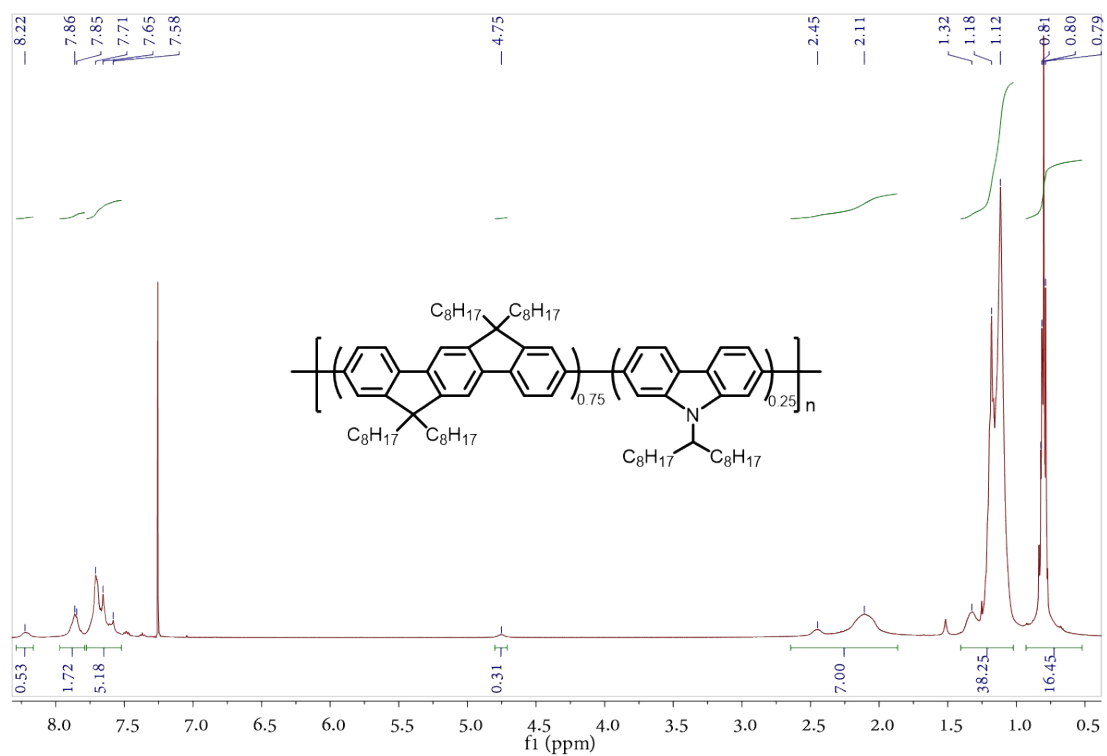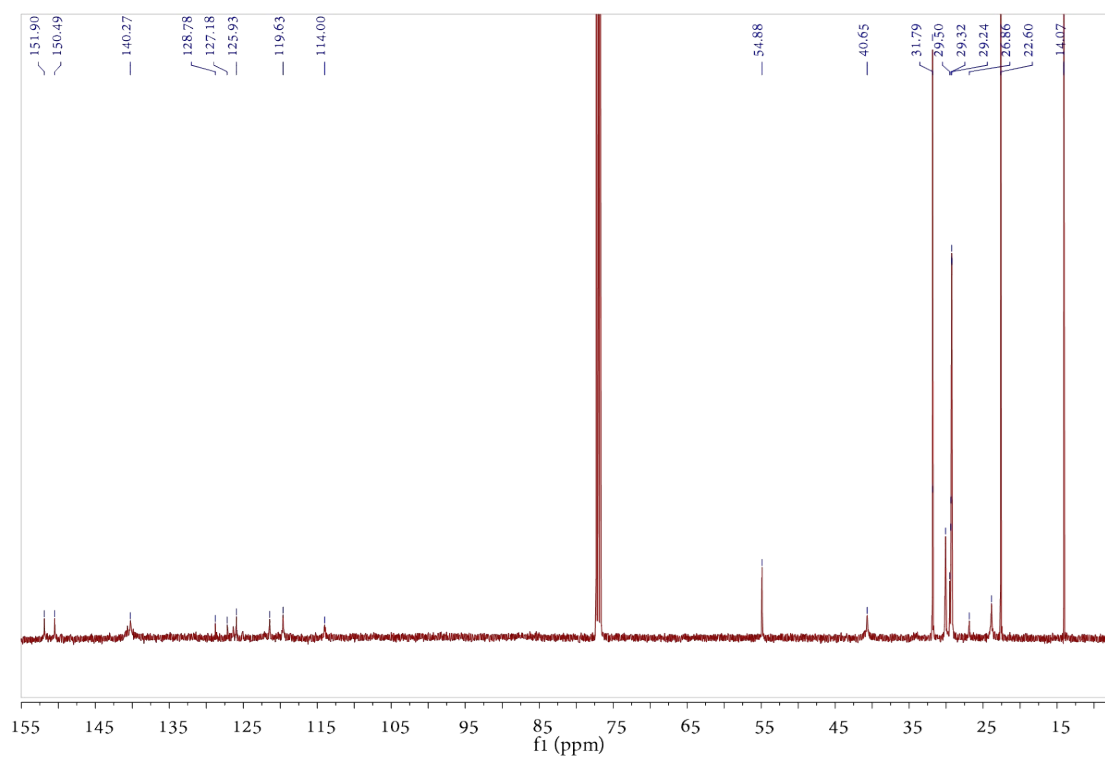

**Figure S13.** <sup>1</sup>H and <sup>13</sup>C NMR spectra of P(IF-Cz25).

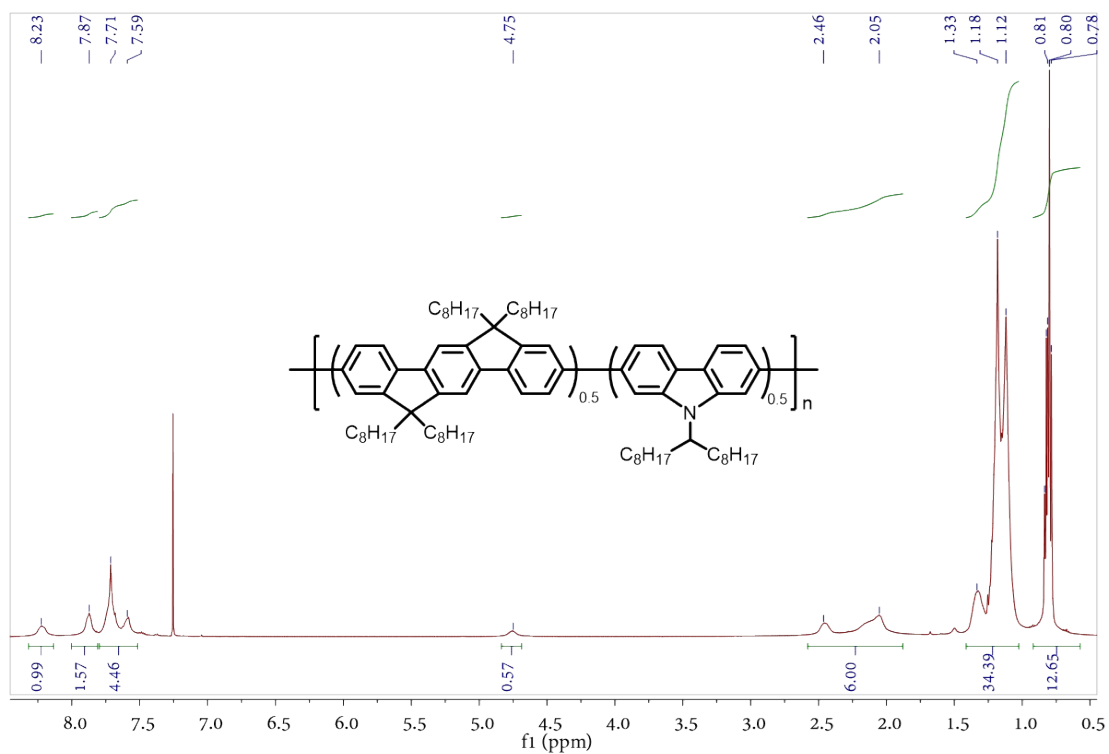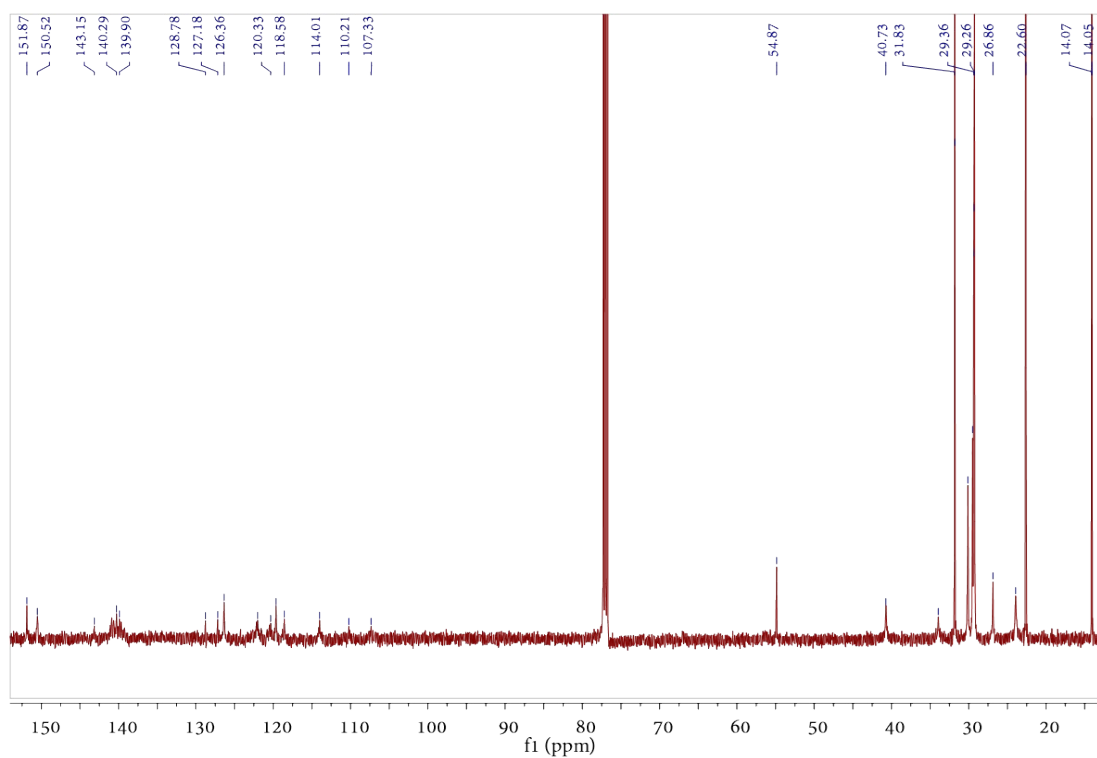

**Figure S14.** <sup>1</sup>H and <sup>13</sup>C NMR spectra of P(IF-Cz50).



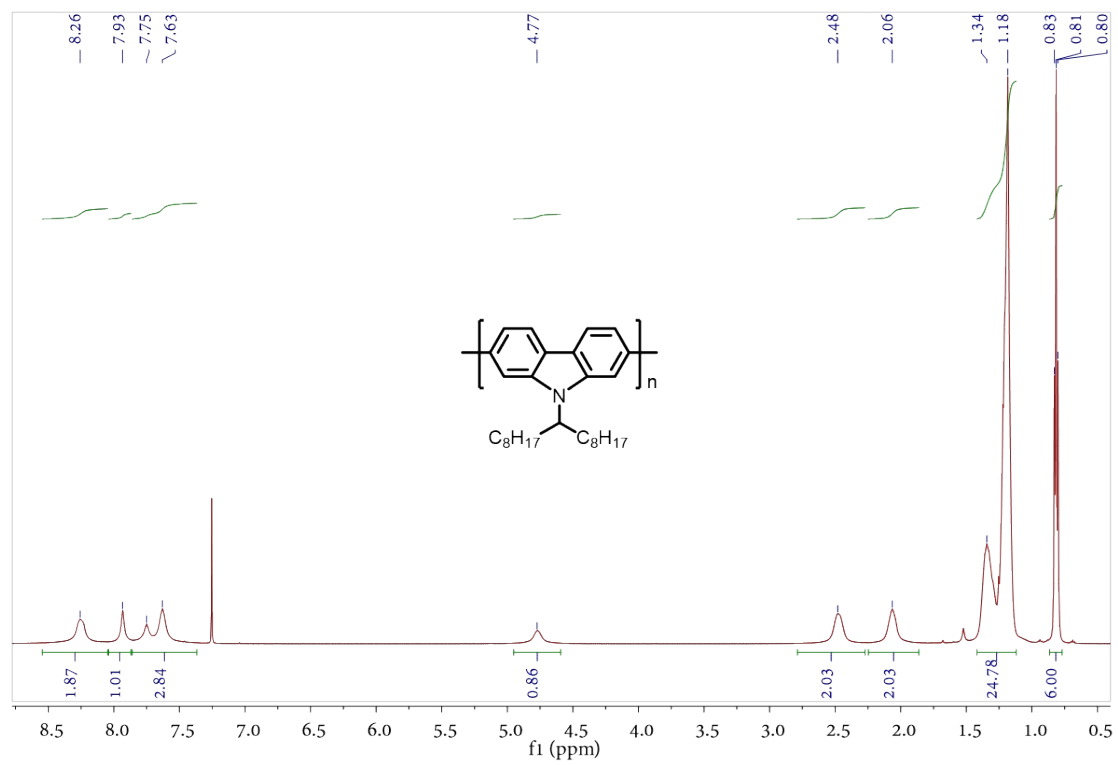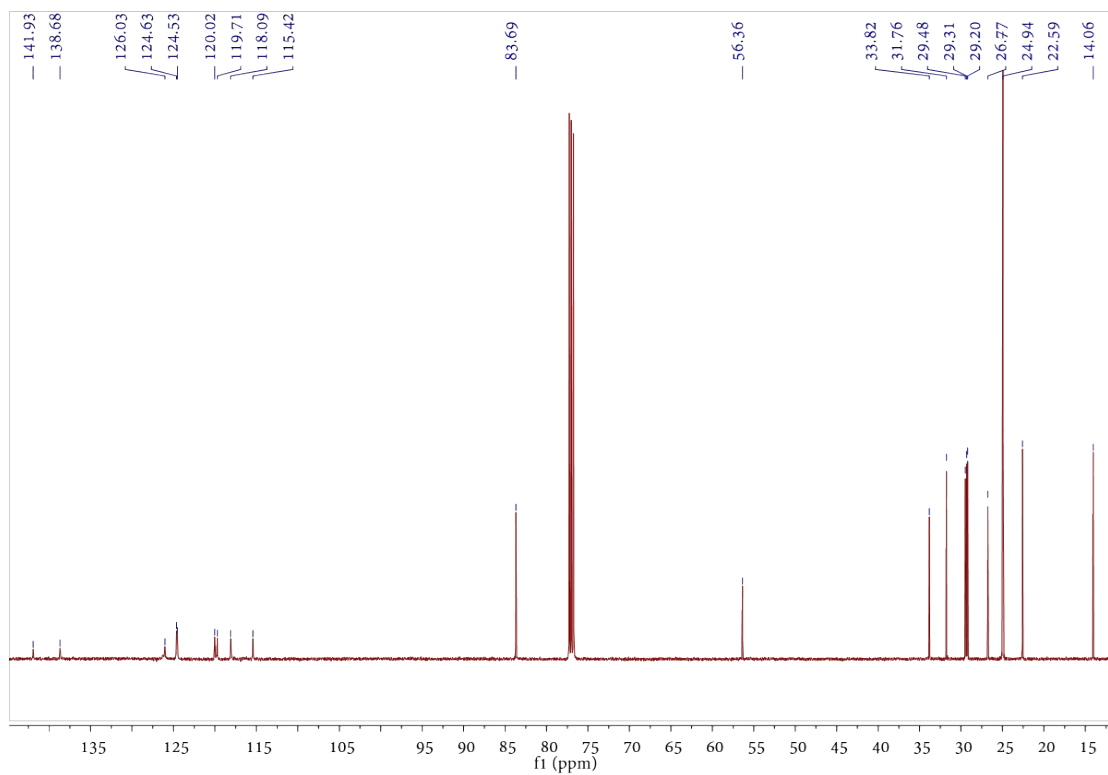

**Figure S15.** <sup>1</sup>H and <sup>13</sup>C NMR spectra of PCz.
